# Supplementary material for: Eu3+ doped α-sodium gadolinium fluoride luminomagnetic nanophosphor as a bimodal nanoprobe for high-contrast in vitro bioimaging and external magnetic field tracking applications
Source: Royal Society of Chemistry journal article supplement (doi:10.1039/c6ra04373a), 2016-01-01
Supplement: c6ra04373a1.pdf [file c6ra04373a1.pdf]

## †Electronic Supplementary Information (ESI)

### **Eu<sup>3+</sup> doped $\alpha$ -sodium gadolinium fluoride luminomagnetic nanophosphor as a bimodal nanoprobe for high-contrast *in vitro* bioimaging and external magnetic field tracking applications**

Satbir Singh<sup>ab</sup>, Pawan Kumar<sup>ab</sup>, Benny Abraham Kaiparettu<sup>\*cd</sup>, Bipin Kumar Gupta<sup>\*b</sup>

\*Corresponding authors E-mail: [kaippare@bcm.edu](mailto:kaippare@bcm.edu) (B.A. Kaiparettu), [bipinbhu@yahoo.com](mailto:bipinbhu@yahoo.com) (B.K.G.)

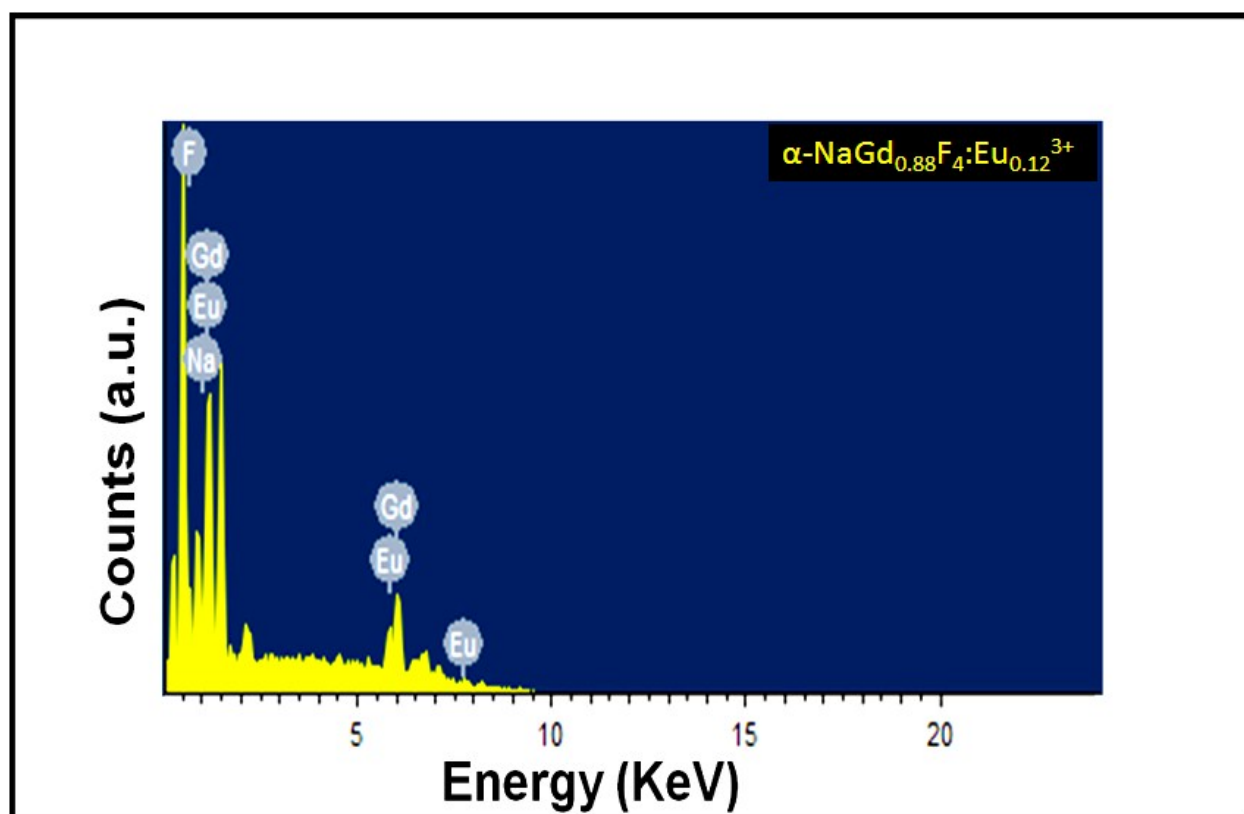

**Fig. S1** The EDAX spectrum of  $\alpha$ -NaGd<sub>0.88</sub>F<sub>4</sub>:Eu<sub>0.12</sub><sup>3+</sup> nanophosphor, which indicates the presence of the Na, Gd, Eu and F elements in nanophosphor.

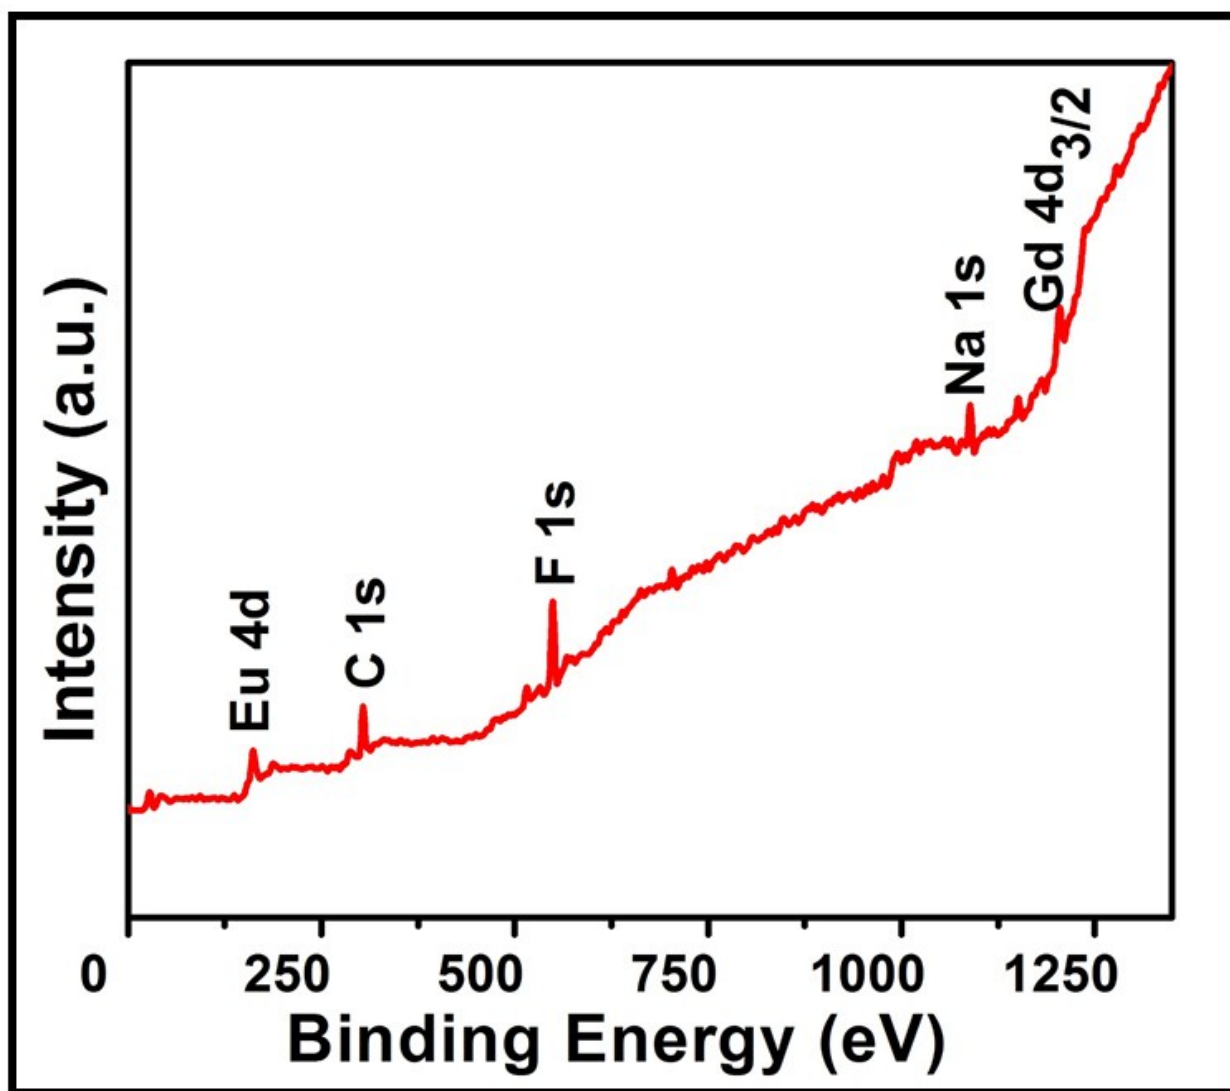

Fig. S2 XPS survey scan spectrum of  $\alpha\text{-NaGd}_{0.88}\text{F}_4\text{:Eu}_{0.12}^{3+}$  nanophosphor.

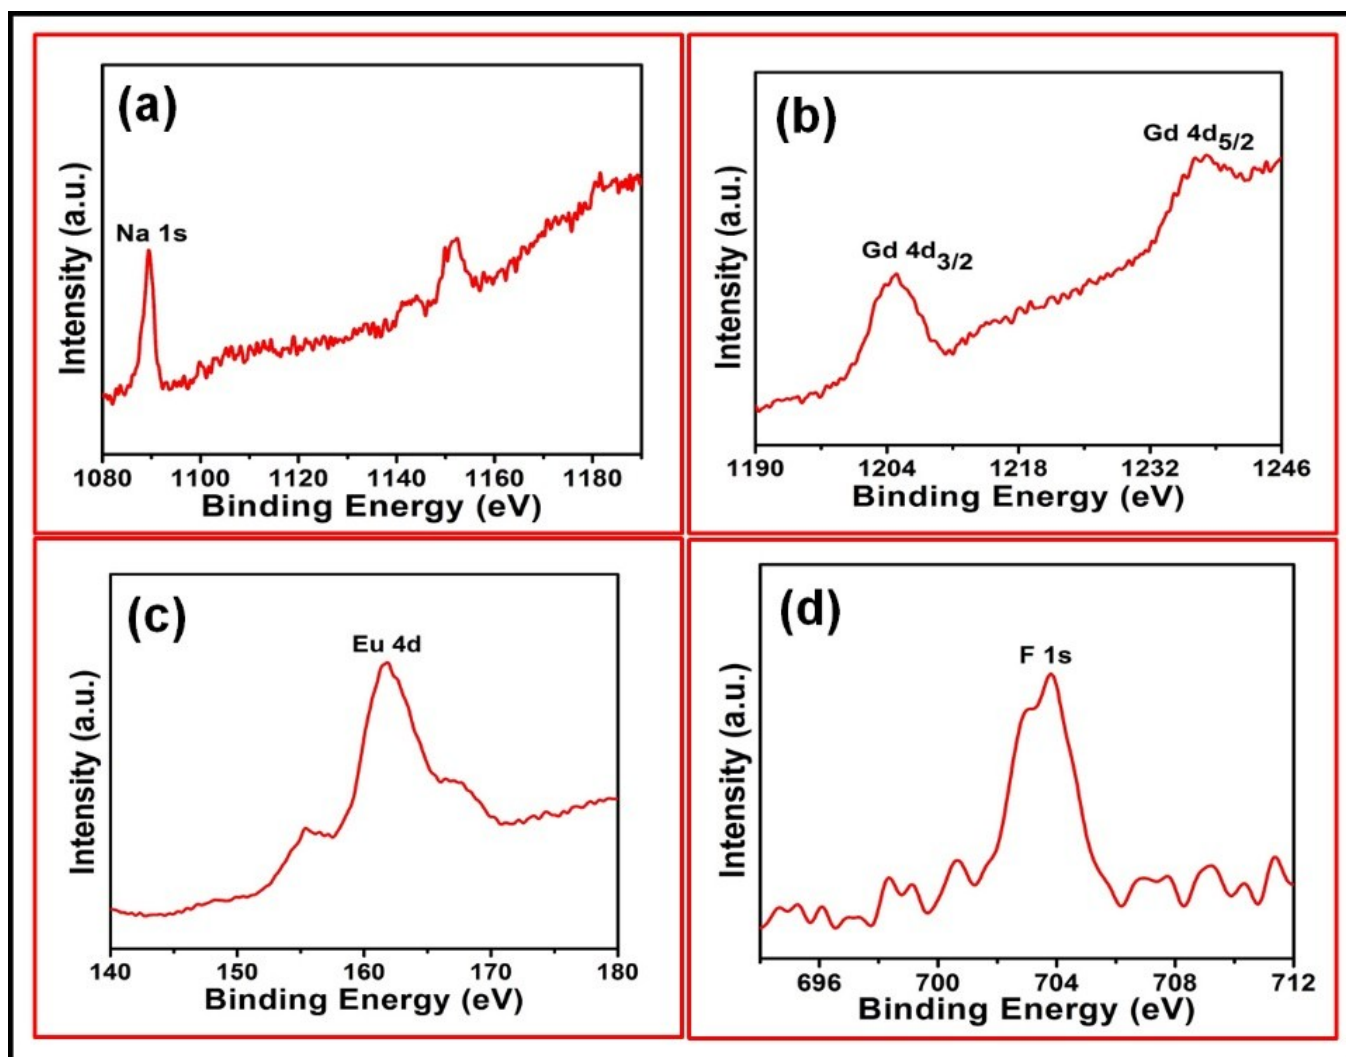

**Fig. S3** Core level spectra of  $\alpha$ -NaGd<sub>0.88</sub>F<sub>4</sub>:Eu<sub>0.12</sub><sup>3+</sup> nanophosphor (a) Na, (b) Gd, (c) Eu and (d) F.

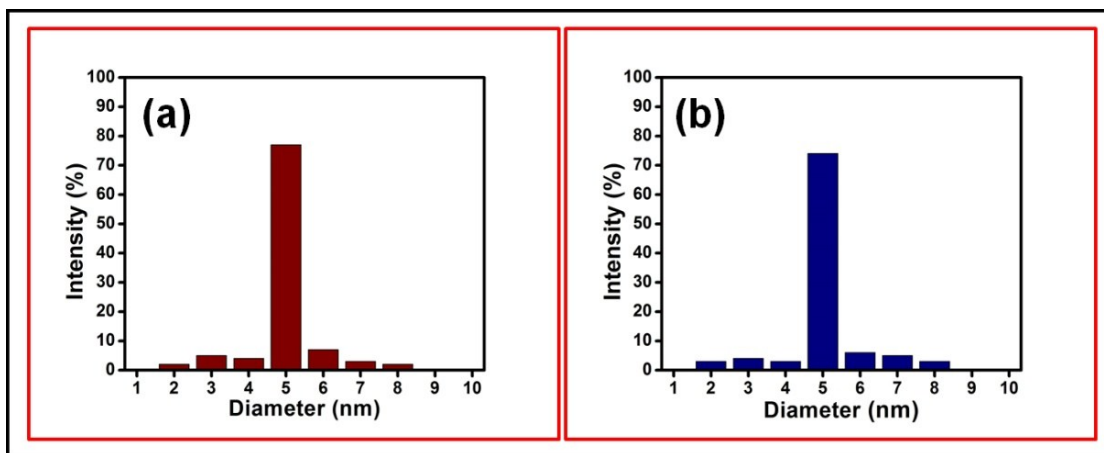

**Fig. S4** Size distribution plots obtained from DLS studies for  $\alpha$ -NaGd<sub>0.88</sub>F<sub>4</sub>:Eu<sub>0.12</sub><sup>3+</sup> nanophosphor dispersed in (a) ethanol and (b) DI water.

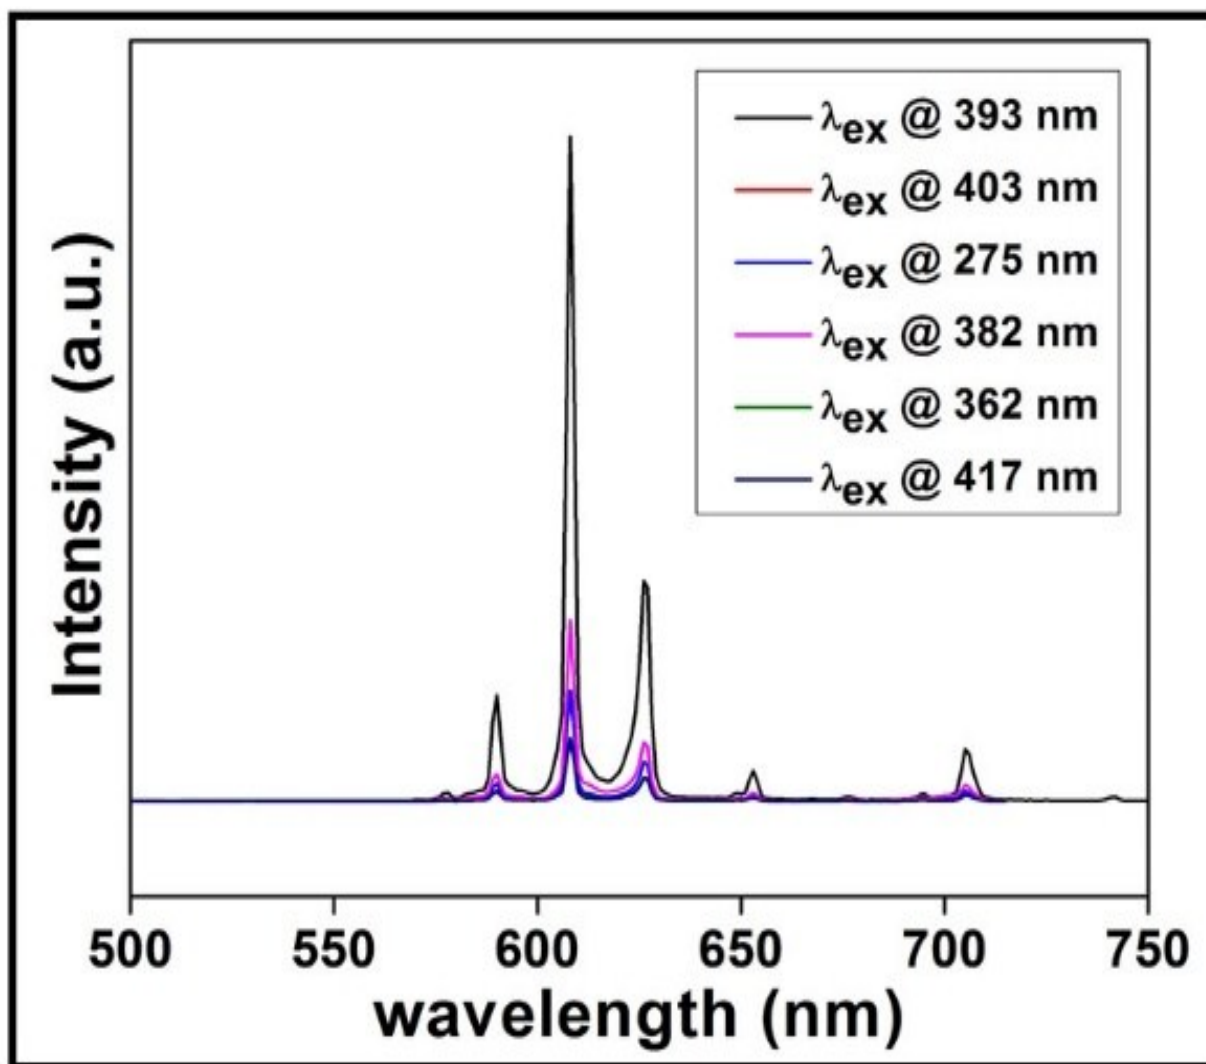

**Fig. S5** PL emission spectra of  $\alpha\text{-NaGd}_{0.88}\text{F}_4\text{:Eu}_{0.12}^{3+}$  nanophosphor under different excitation wavelengths.

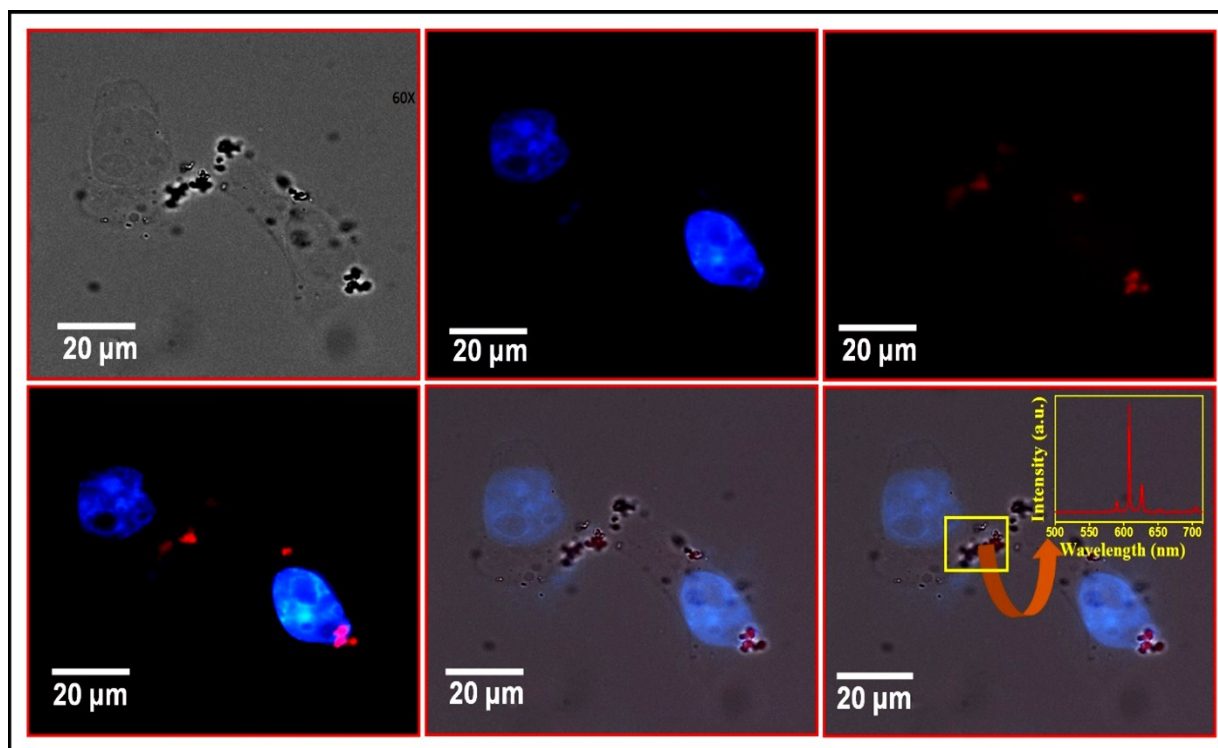

**Fig. S6** *In vitro* fluorescent microscopic images of HeLa cells, incubated with  $\alpha\text{-NaGd}_{0.88}\text{F}_4\text{:Eu}_{0.12}^{3+}$  nanophosphor. Sequential images show; (a) phase contrast picture of HeLa cells, (b) individual nucleus stained blue with DAPI, (c) red fluorescence staining by  $\alpha\text{-NaGd}_{0.88}\text{F}_4\text{:Eu}_{0.12}^{3+}$  nanophosphor, (d) overlapped image from blue DAPI and red  $\alpha\text{-NaGd}_{0.88}\text{F}_4\text{:Eu}_{0.12}^{3+}$  nanophosphor images, (e) overlap of phase contrast, blue and red from (a), (b) and (c) images respectively, (f) *in vitro* localized PL image of  $\alpha\text{-NaGd}_{0.88}\text{F}_4\text{:Eu}_{0.12}^{3+}$  nanophosphor from (e). Inset of (f) shows the localized PL taken from  $\alpha\text{-NaGd}_{0.88}\text{F}_4\text{:Eu}_{0.12}^{3+}$  nanophosphor labelled HeLa cells (red).

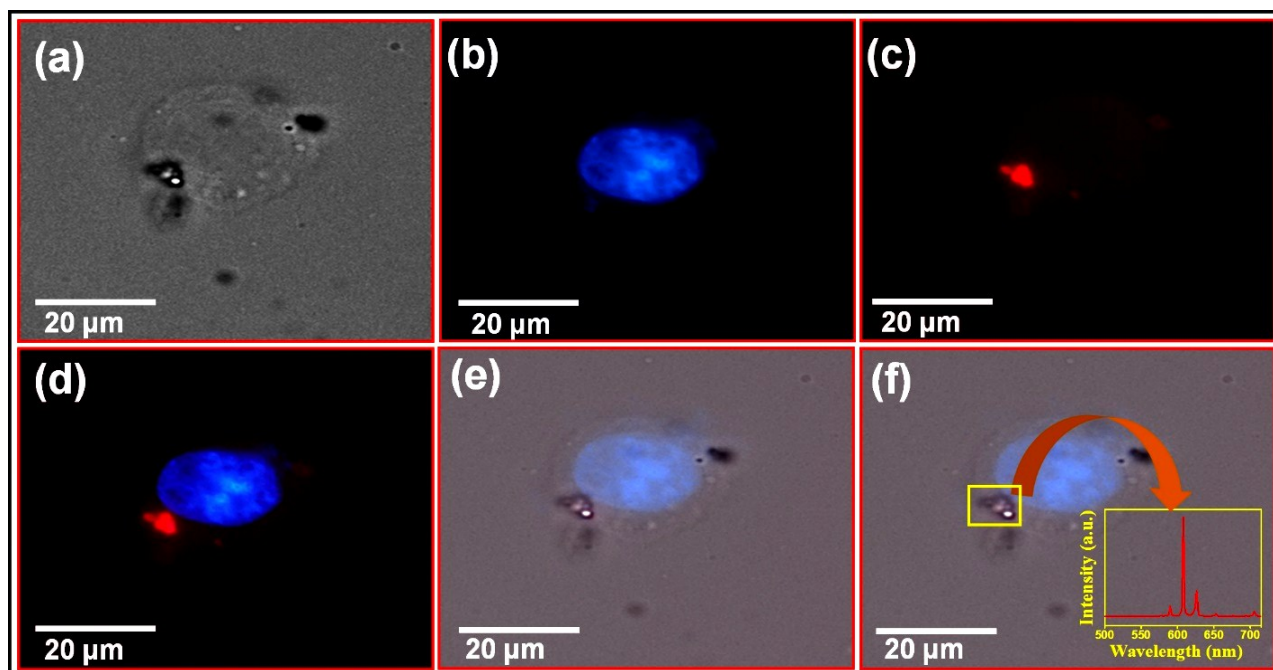

**Fig. S7** *In vitro* fluorescent microscopic images of HeLa cells, incubated with  $\alpha\text{-NaGd}_{0.88}\text{F}_4\text{:Eu}_{0.12}^{3+}$  nanophosphor. Sequential images show; (a) phase contrast picture of HeLa cells, (b) individual nucleus stained blue with DAPI, (c) red fluorescence staining by  $\alpha\text{-NaGd}_{0.88}\text{F}_4\text{:Eu}_{0.12}^{3+}$  nanophosphor, (d) overlapped image from blue DAPI and red  $\alpha\text{-NaGd}_{0.88}\text{F}_4\text{:Eu}_{0.12}^{3+}$  nanophosphor images, (e) overlap of phase contrast, blue and red from (a), (b) and (c) images respectively, (f) *in vitro* localized PL image of  $\alpha\text{-NaGd}_{0.88}\text{F}_4\text{:Eu}_{0.12}^{3+}$  nanophosphor from (e). Inset of (f) shows the localized PL taken from  $\alpha\text{-NaGd}_{0.88}\text{F}_4\text{:Eu}_{0.12}^{3+}$  nanophosphor labelled HeLa cells (red).
